# Supplementary material for: A metallic two-dimensional b-BS2 monolayer as a superior Na/K-ion battery anode
Source: Royal Society of Chemistry journal article supplement (doi:10.1039/d3cp04506d), 2024-01-01
Supplement: d3cp04506d1.pdf [file d3cp04506d1.pdf]

## **Metallic two-dimensional *b*-BS<sub>2</sub> monolayer for superior Na/K-ion batteries anodes**

Zhifang Yang, Wenliang Li,\* Jingping Zhang\*

Faculty of Chemistry, National & Local United Engineering Laboratory for Power Batteries, Northeast Normal University, Changchun 130024, China;

E-mail: [jpzhang@nenu.edu.cn](mailto:jpzhang@nenu.edu.cn); [liwl926@nenu.edu.cn](mailto:liwl926@nenu.edu.cn)

The particle swarm optimization (PSO) method within the evolutionary algorithm as implemented in the Crystal structure AnaLYsis by Particle Swarm Optimization (CALYPSO) code was employed to find the lowest energy structures of BS<sub>x</sub> ( $x = 0.5, 1, 1.5, 2$ ) monolayers. In the first step, random structures with certain symmetry are constructed in which atomic coordinates are generated by the crystallographic symmetry operations.

Up to now, a few BS<sub>x</sub> (e.g. B<sub>2</sub>S, BS, and B<sub>2</sub>S<sub>3</sub>) monolayers have been reported. To determine the relative stability of our predicted *b*-BS<sub>2</sub> monolayer, we fully relaxed the other known BS<sub>x</sub> monolayers and built the convex hull, as shown in Fig. S1. The *b*-BS<sub>2</sub> monolayer, sitting on the solid line, is thermodynamically stable with respect to decomposition into B and S elements.

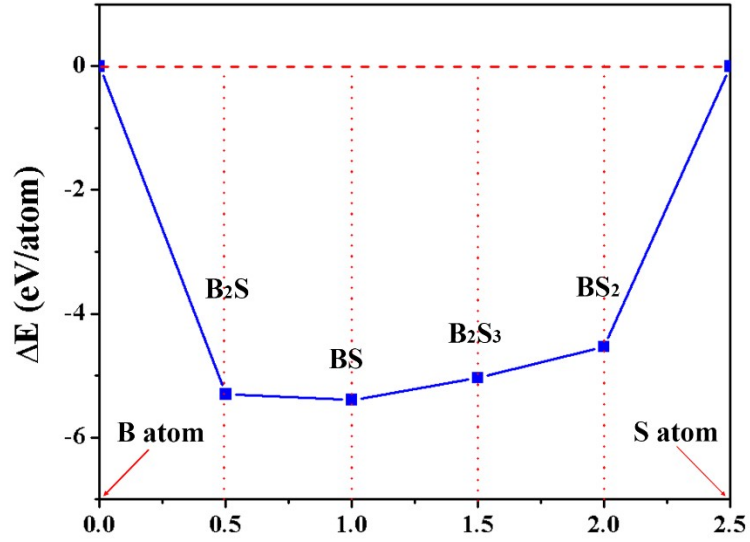

**Fig. S1.** (a) Relative formation energy of BS<sub>x</sub> (x = 0.5, 1, 1.5, 2) monolayers with respect to B and S atoms at 0 K.

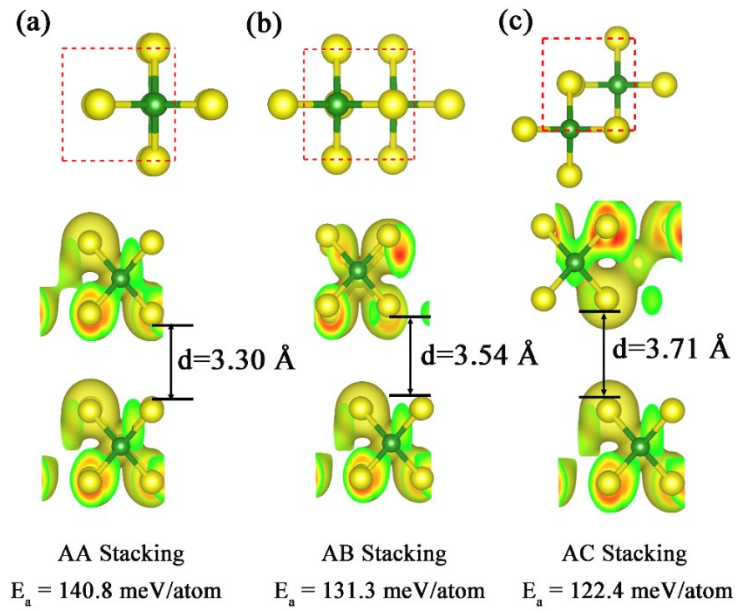

**Fig. S2.** (a)-(c) Geometries of the BS<sub>2</sub> bilayer with AA, AB, and AC stacking patterns, corresponding their interlayer distances and interaction energies.

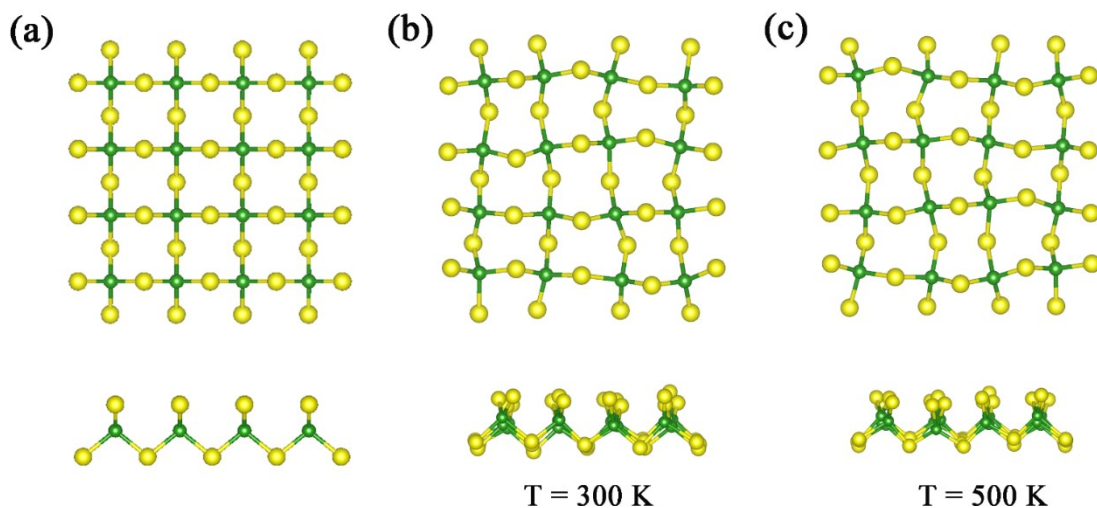

**Fig. S3.** The BS<sub>2</sub> monolayer structures of (a) original, (b) 300 K, and (c) 500 K at the end of 5 ps with a time step of 1.0 fs AIMD simulations.

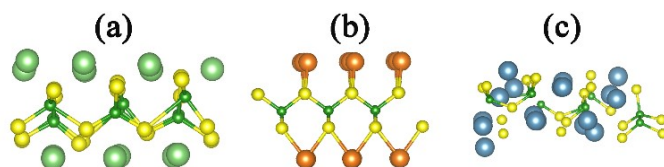

**Fig. S4.** Geometric structures for (a) Li, (b) Mg, and (c) Ca adsorption on the BS<sub>2</sub> monolayer of side views.

Table S1 Comparison of capacity of previously reported 2D materials with *b*-BS<sub>2</sub> monolayer for NIBs and KIBs.

|                               | Na                   | K                   |
|-------------------------------|----------------------|---------------------|
| PC <sub>6</sub>               | 1301.07 <sup>1</sup> | 781 <sup>2</sup>    |
| PC <sub>3</sub>               | 1200 <sup>3</sup>    | 1200 <sup>4</sup>   |
| Si <sub>3</sub> C             | 1115 <sup>5</sup>    | 836 <sup>5</sup>    |
| BC <sub>3</sub>               | 572 <sup>6</sup>     | 858 <sup>6</sup>    |
| B <sub>2</sub> C              | 1596                 |                     |
| BC <sub>7</sub>               | 870.25 <sup>7</sup>  |                     |
| B <sub>3</sub> P              | 1706                 |                     |
| <i>Penta</i> -BN <sub>2</sub> | 690.23 <sup>8</sup>  | 690.23 <sup>8</sup> |
| B <sub>2</sub> S              | 831.48 <sup>9</sup>  |                     |
| <i>b</i> -BS <sub>2</sub>     | 2146.08              | 715.36              |

## References

1. Yang, M.; Kong, F.; Chen, L.; Tian, B.; Guo, J., Potential application of two-dimensional PC<sub>6</sub> monolayer as an anode material in alkali metal-ion (Li, Na, K) batteries. *Thin Solid Films* **2023**, *769*, 139734.
2. Dou, K.; Ma, Y.; Zhang, T.; Huang, B.; Dai, Y., Prediction of two-dimensional PC<sub>6</sub> as a promising anode material for potassium-ion batteries. *Phys. Chem. Chem. Phys* **2019**, *21*, 26212-26218.
3. Jana, S.; Thomas, S.; Lee, C. H.; Jun, B.; Lee, S. U., Rational design of a PC<sub>3</sub> monolayer: A high-capacity, rapidly charging anode material for sodium-ion batteries. *Carbon* **2020**, *157*, 420-426.
4. Guan, X. P.; Song, H. J.; Tang, Y.; Zhong, X. L.; Wang, J. B.; Cheng, J. J.; Zou, D. F., Theory prediction of PC<sub>3</sub> monolayer as a promising anode material in potassium-ion batteries. *Ionics* **2021**, *27*, 2465-2471.
5. Wang, Y.; Li, Y., Ab initio prediction of two-dimensional Si<sub>3</sub>C enabling high specific capacity as an anode material for Li/Na/K-ion batteries. *J.Mater. Chem. A* **2020**, *8*, 4274-4282.
6. Joshi, R. P.; Ozdemir, B.; Barone, V.; Peralta, J. E., Hexagonal BC<sub>3</sub>: A Robust Electrode Material for Li, Na, and K Ion Batteries. *J.Phys. Chem. Lett.* **2015**, *6*, 2728-2732.
7. Belasfar, K.; El Kenz, A.; Benyoussef, A., First-principles study of BC<sub>7</sub> monolayer an ultra-high capacity anode for lithium-ion and sodium-ion batteries applications. *Mater. Chem. Phys.* **2021**, *257*, 123751.
8. Yang, M.; Chen, L.; Kong, F.; Guo, J.; Shu, H.; Dai, J., Metallic Penta-BN<sub>2</sub> monolayer: A novel platform for non-lithium-ion batteries with high capacity and splendid cyclicality. *Mat. Sci. Semicon. Proc.* **2022**, *149*, 106849.
9. Lei, S.; Chen, X.; Xiao, B.; Zhang, W.; Liu, J., Excellent Electrolyte Wettability and High Energy Density of B<sub>2</sub>S as a Two-Dimensional Dirac Anode for Non-Lithium-Ion Batteries. *ACS Appl. Mater. Interfaces* **2019**, *11*, 28830-28840.
